# Supplementary figures and images for: Ant collective cognition allows for efficient navigation through disordered environments
Source: eLife journal article supplement (doi:10.7554/elife.55195), 2020-05-11

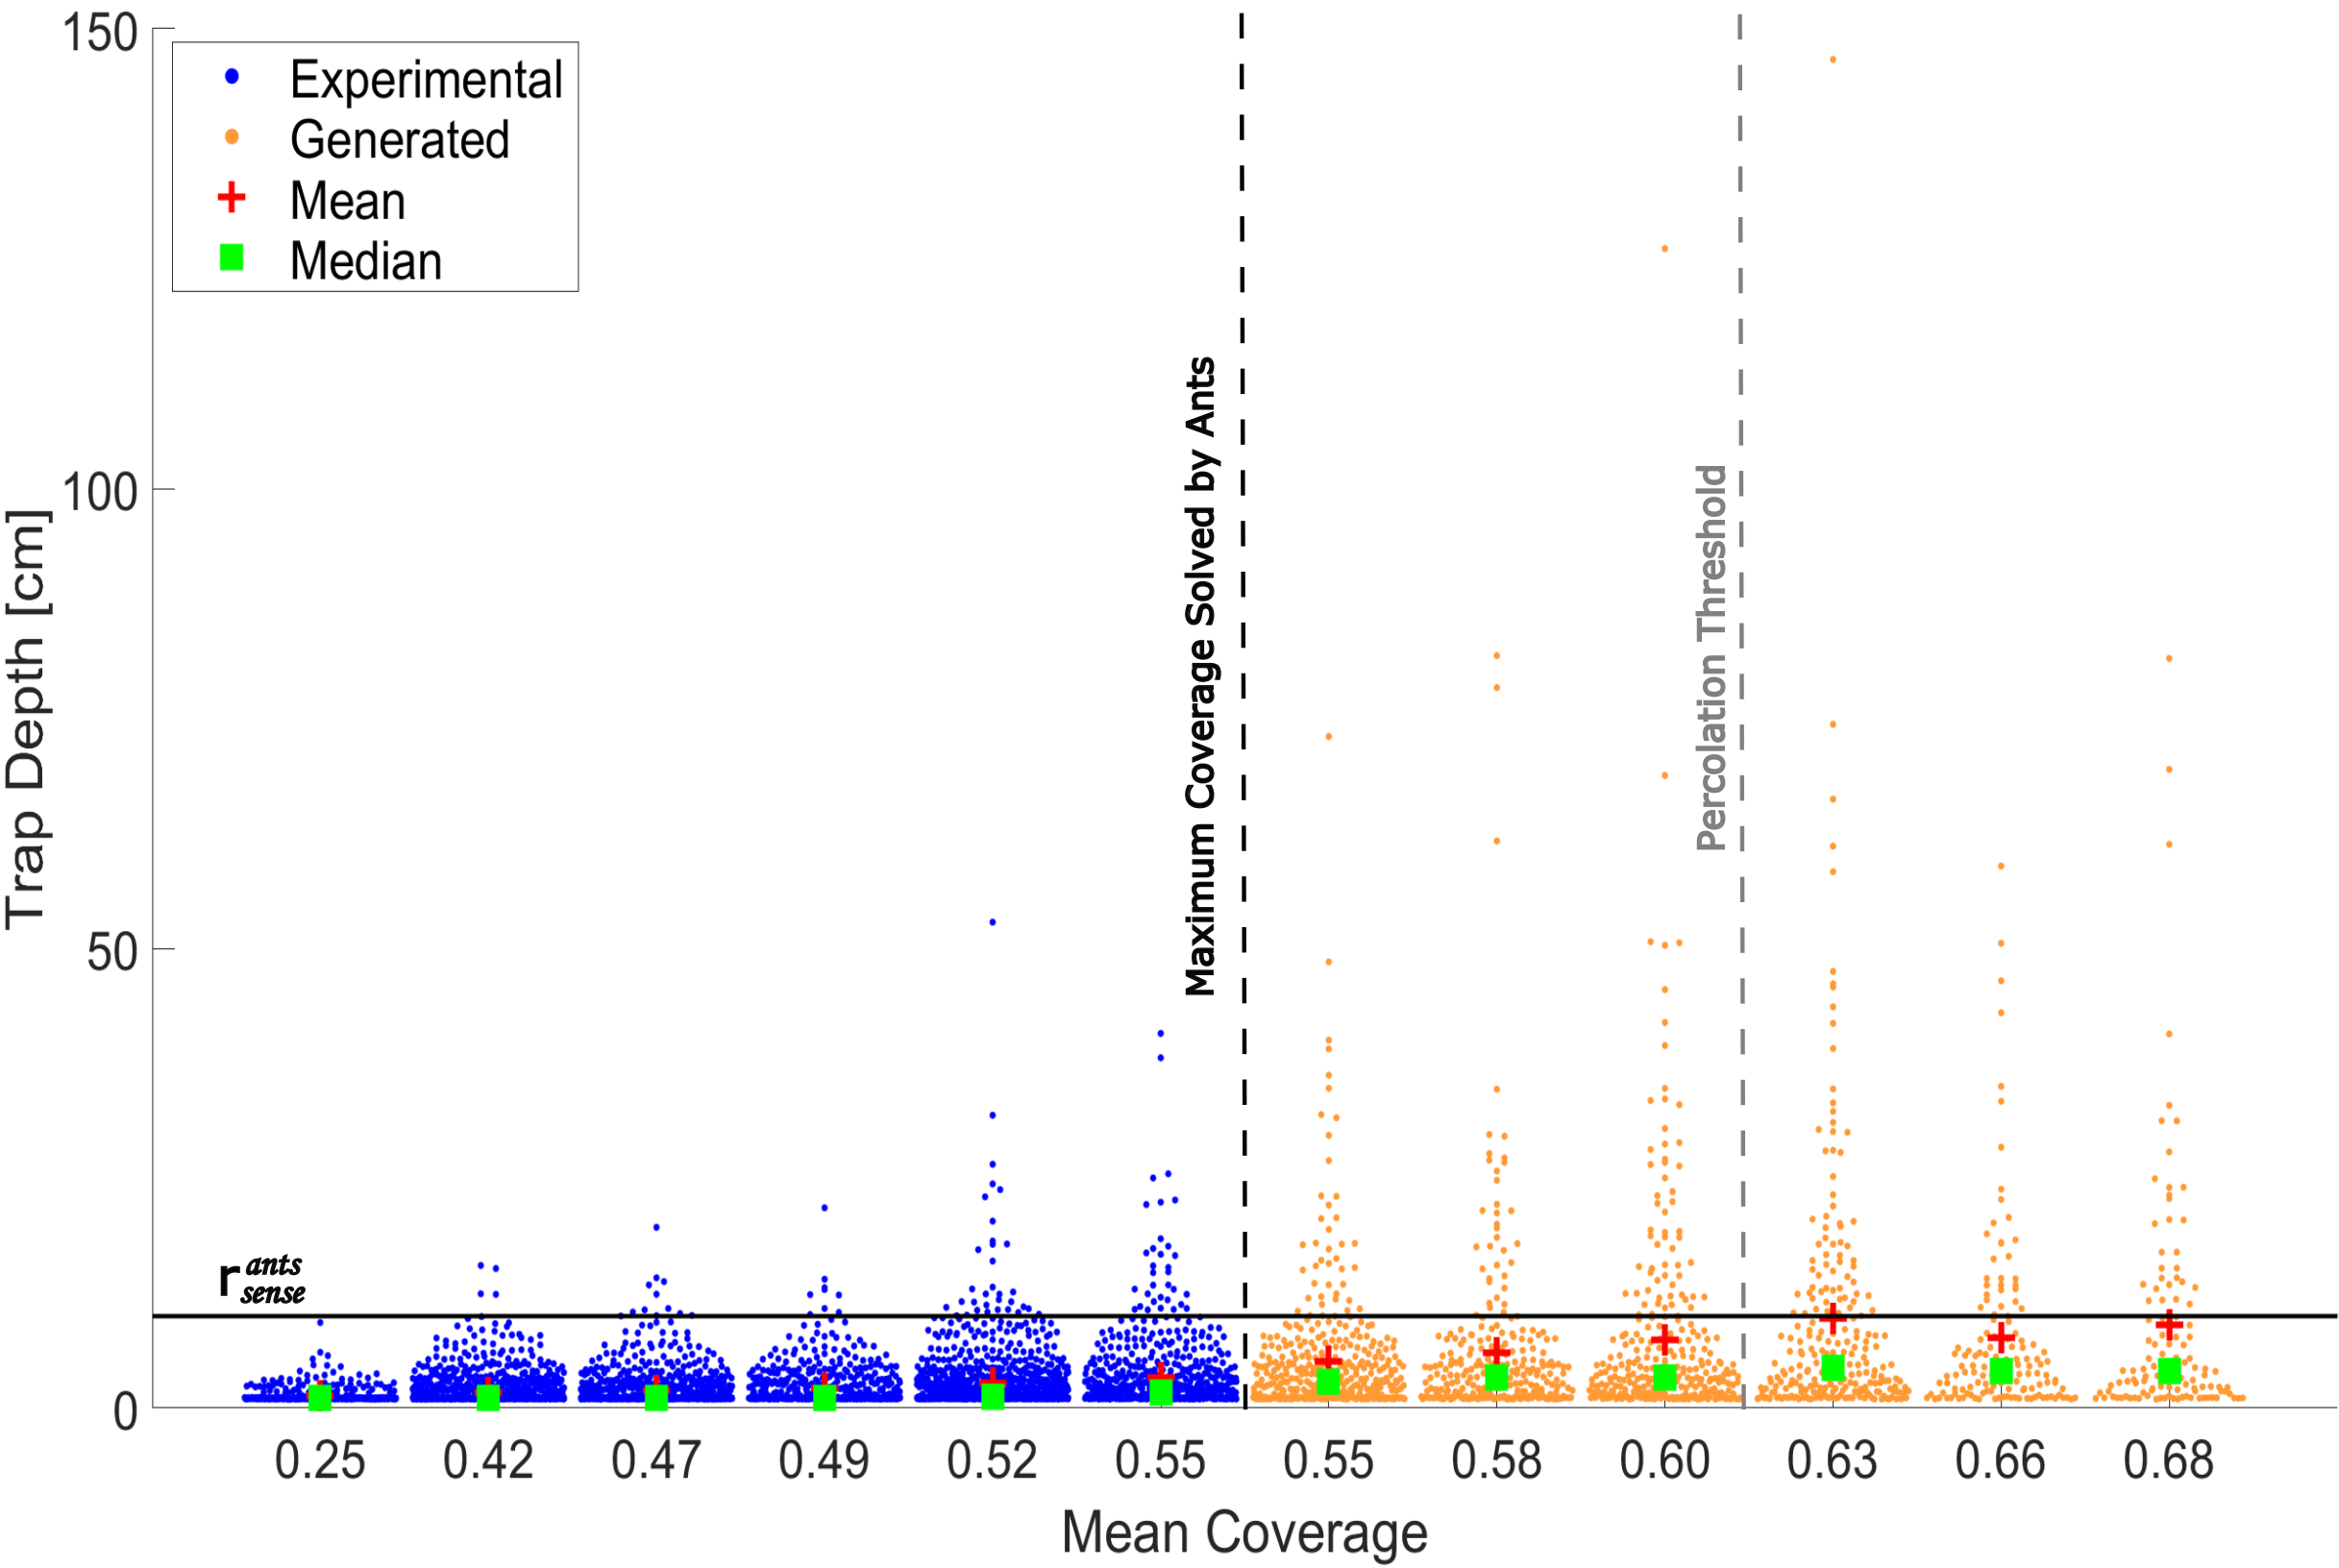

Supplement: supp [file elife-55195-supp-v2.zip]

**a**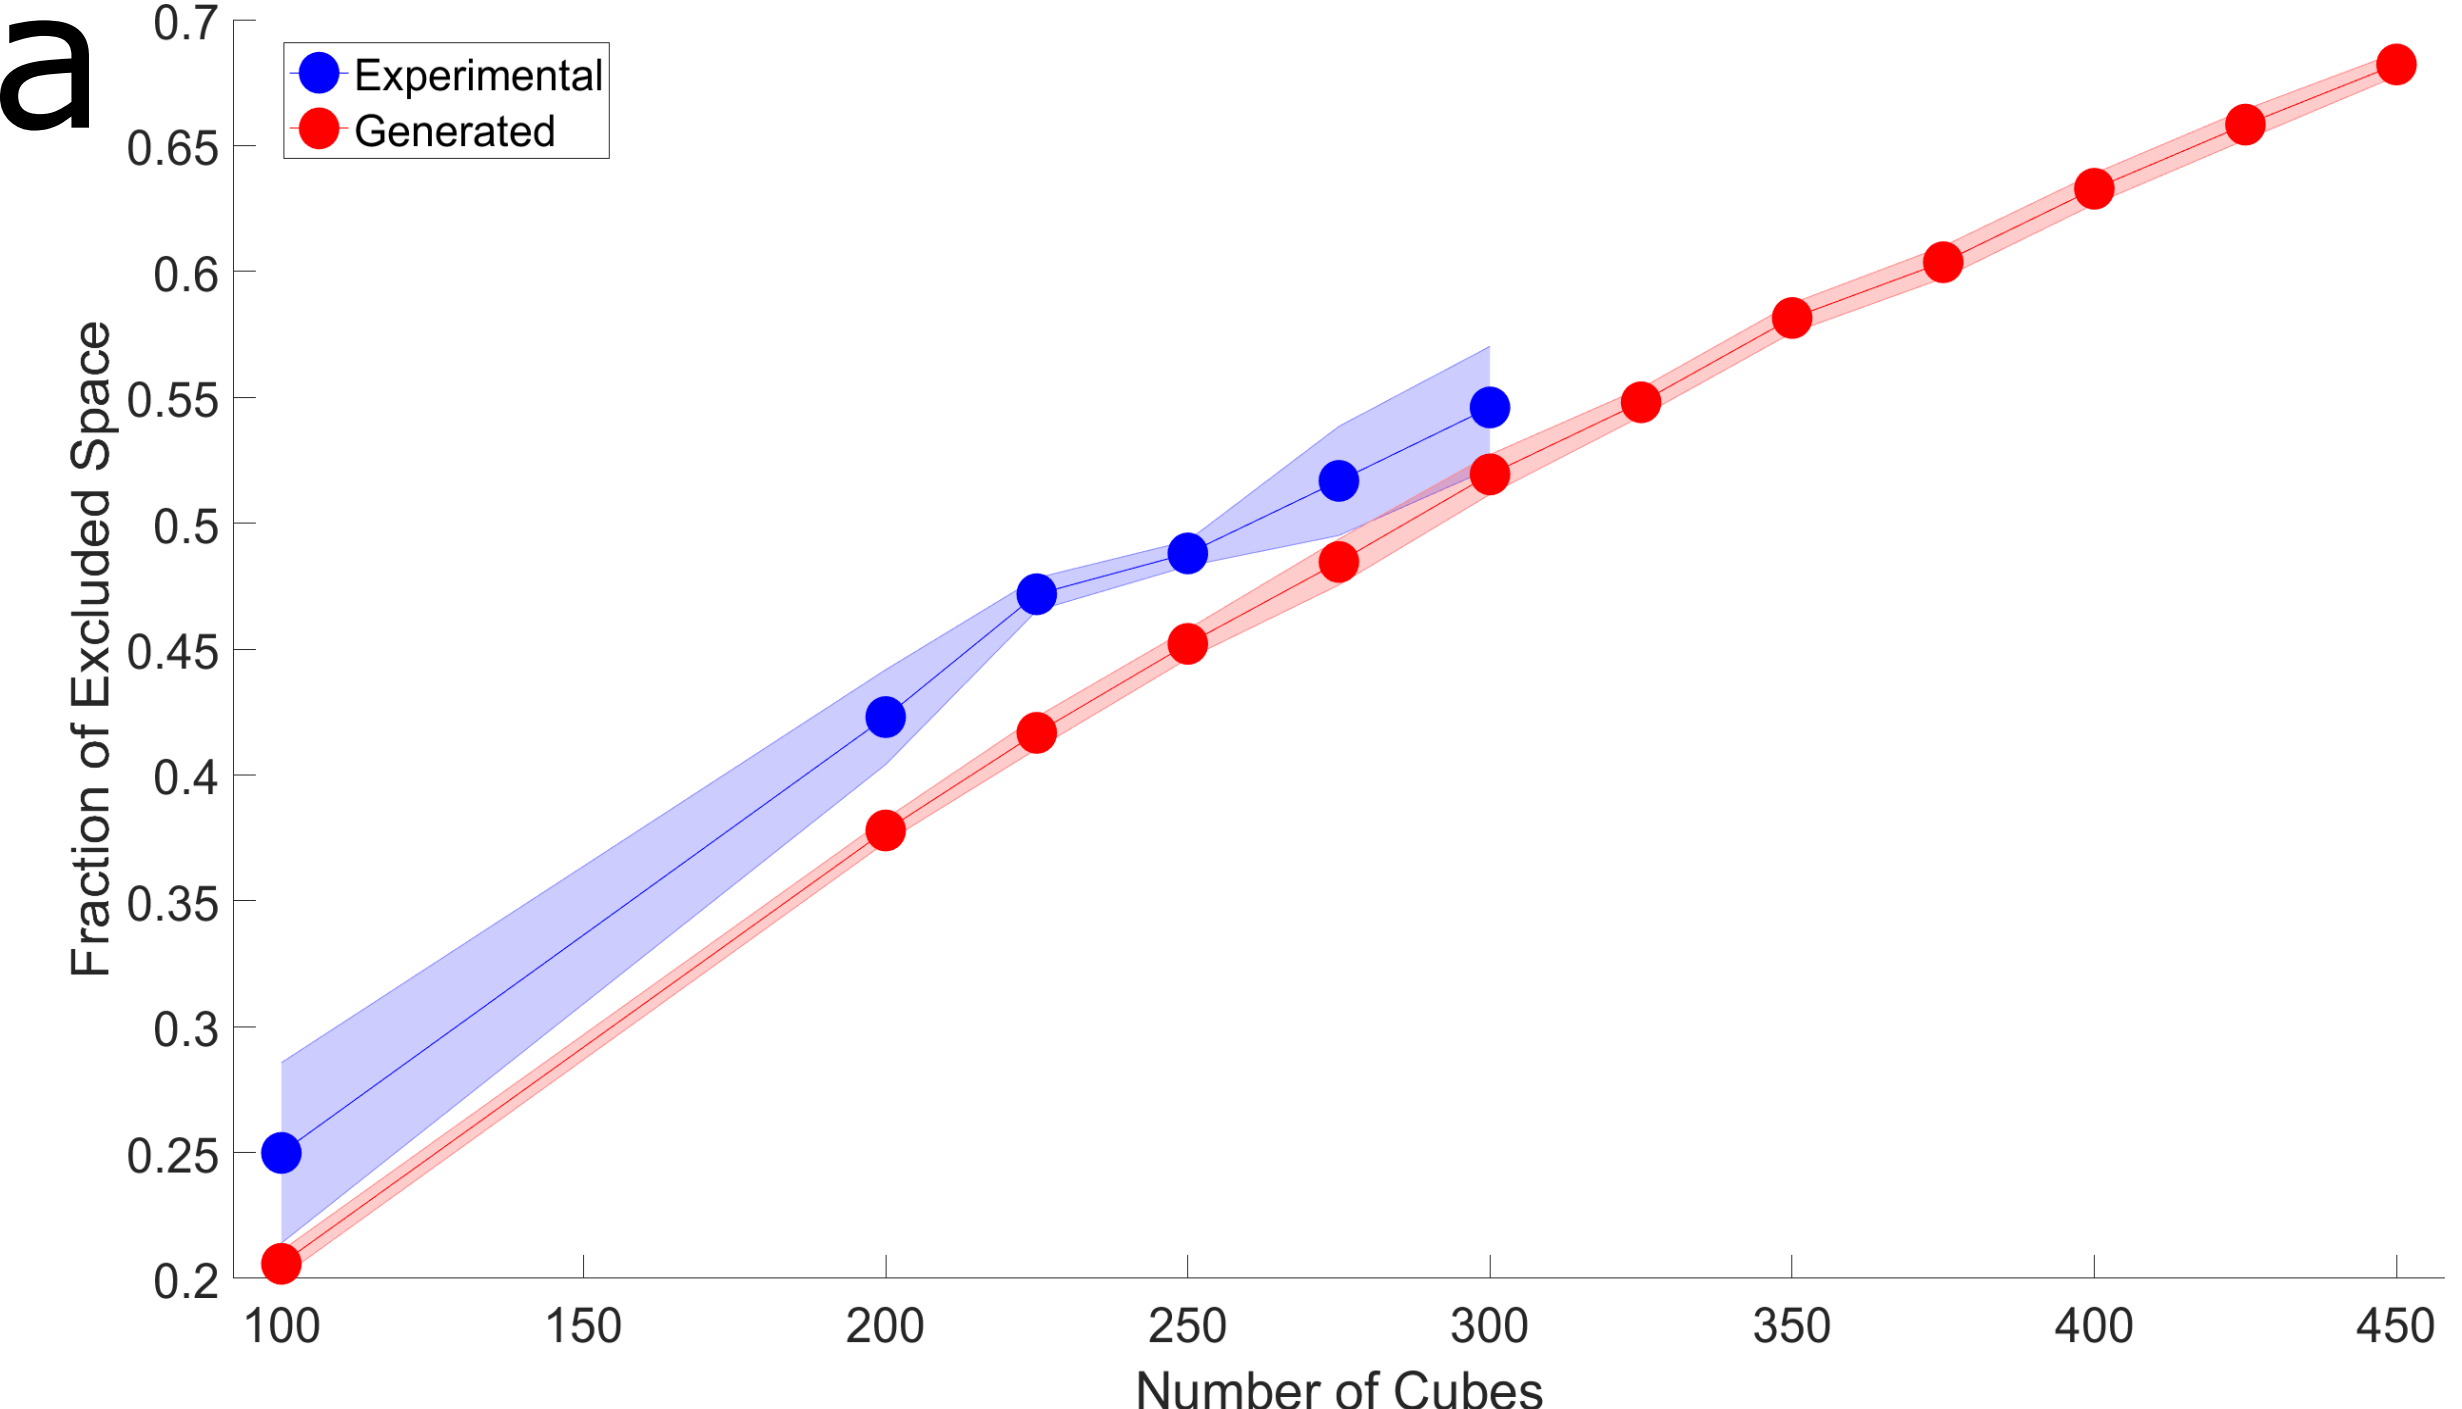**b**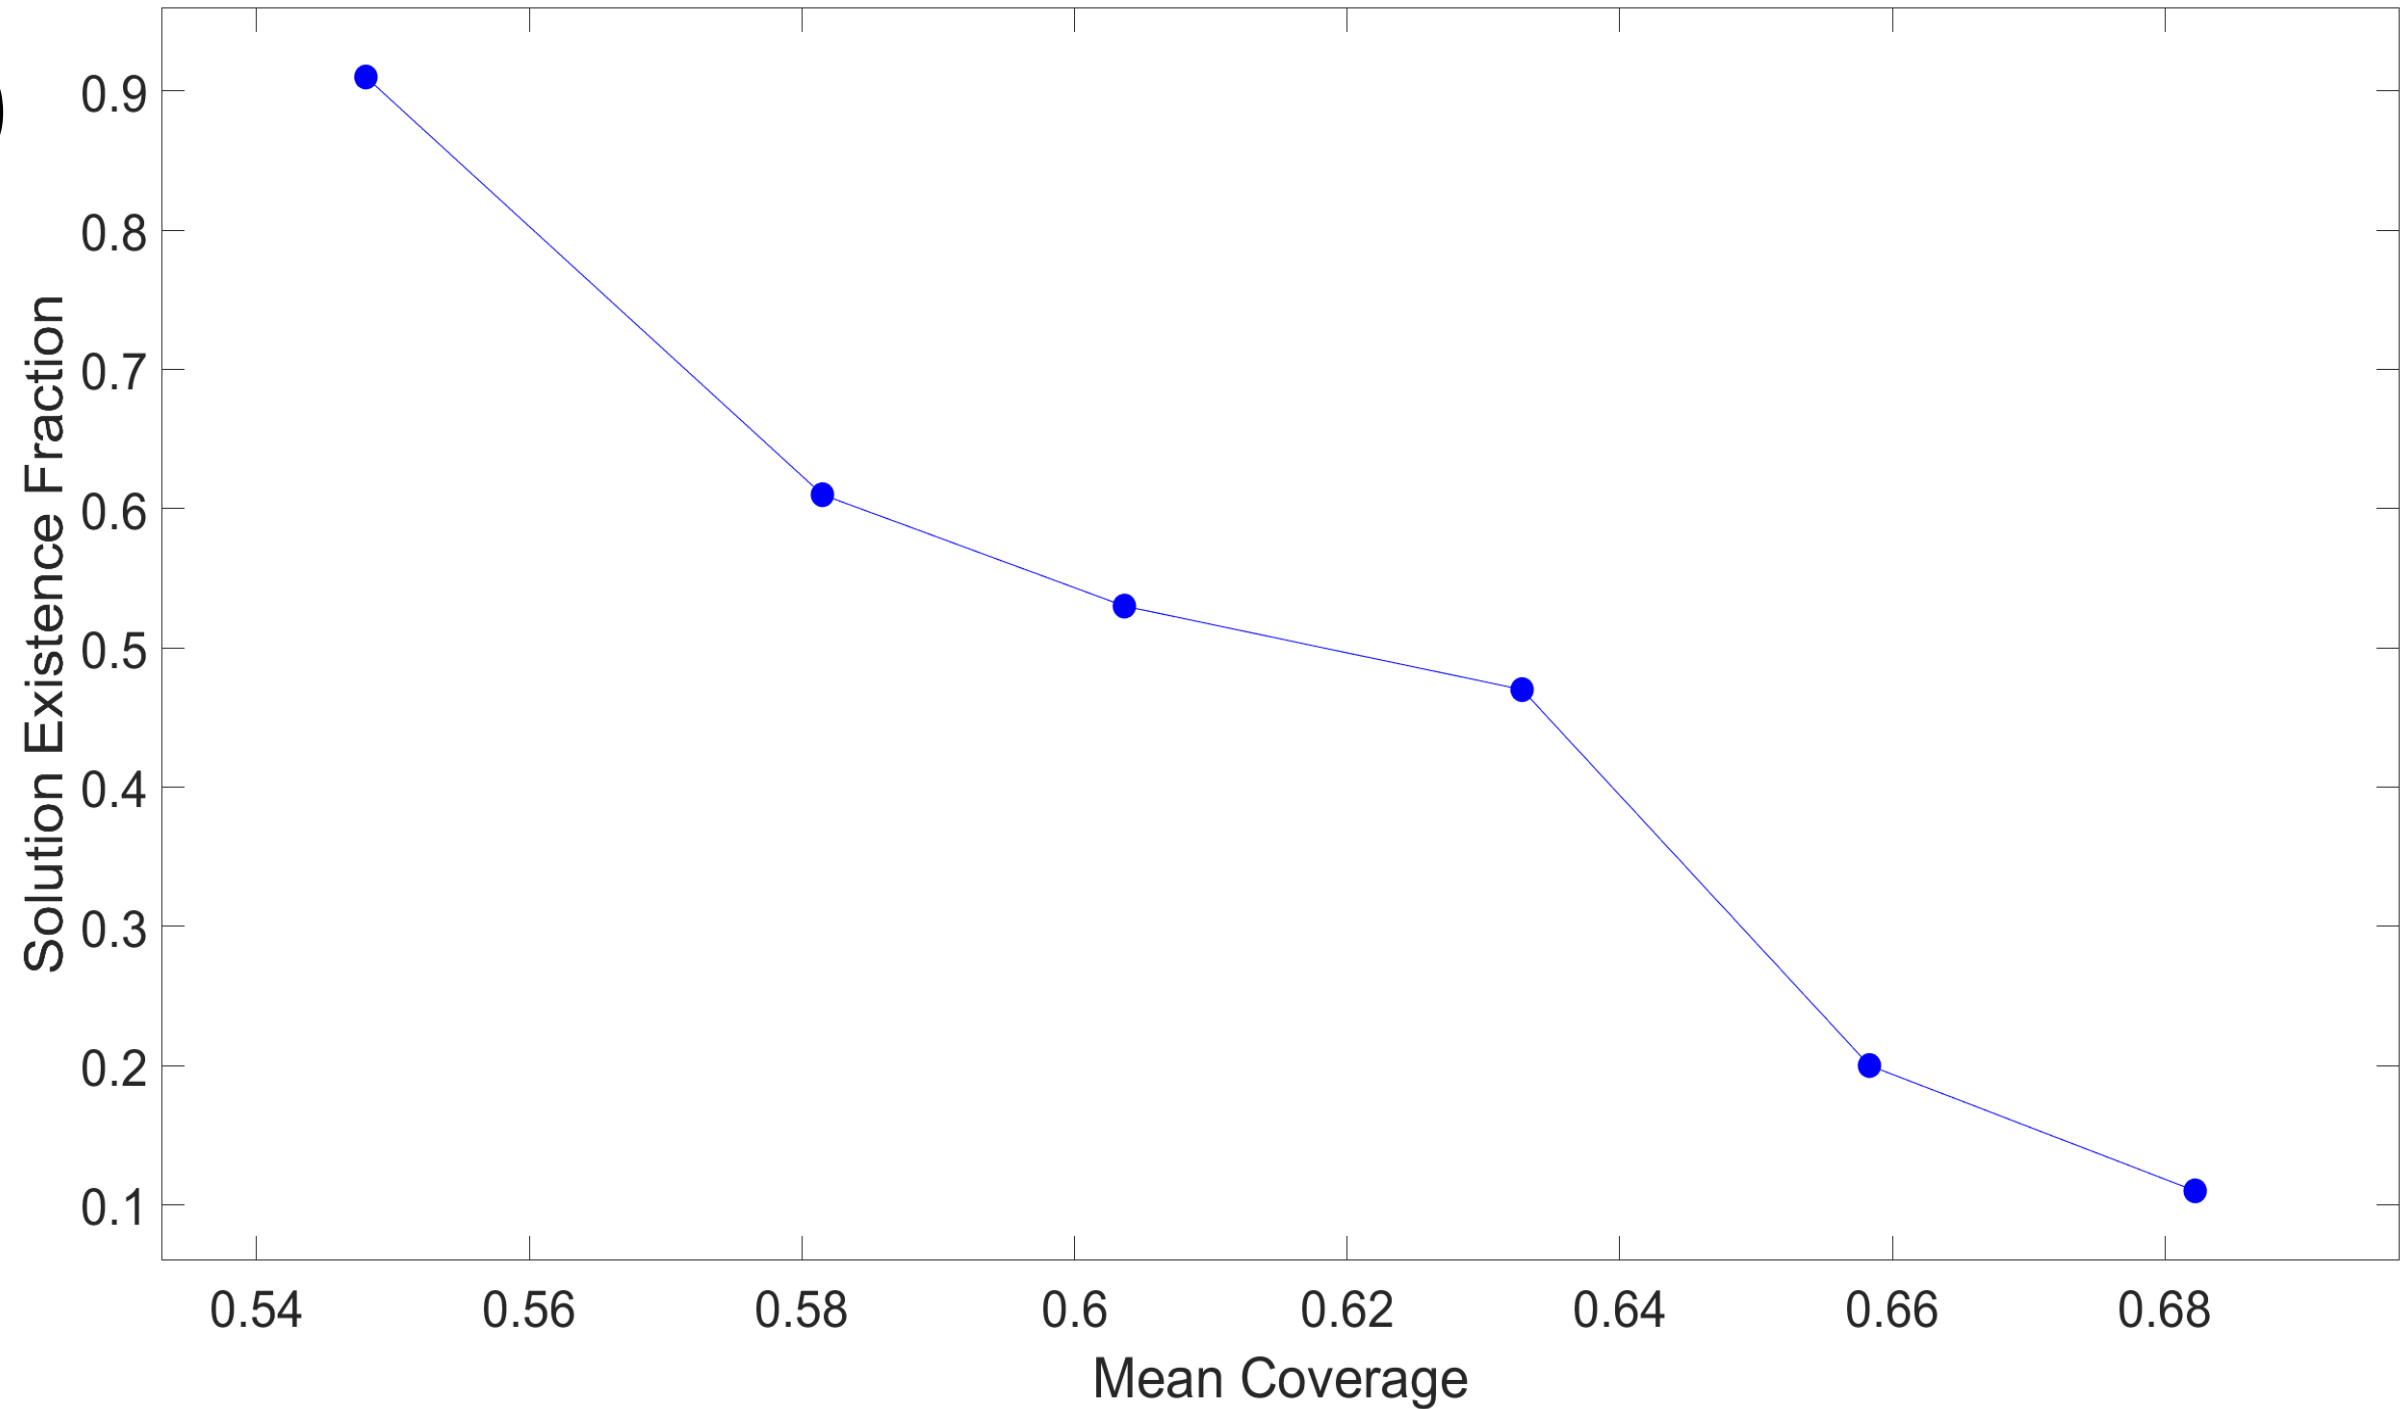

Supplement: supp [file elife-55195-supp-v2.zip]

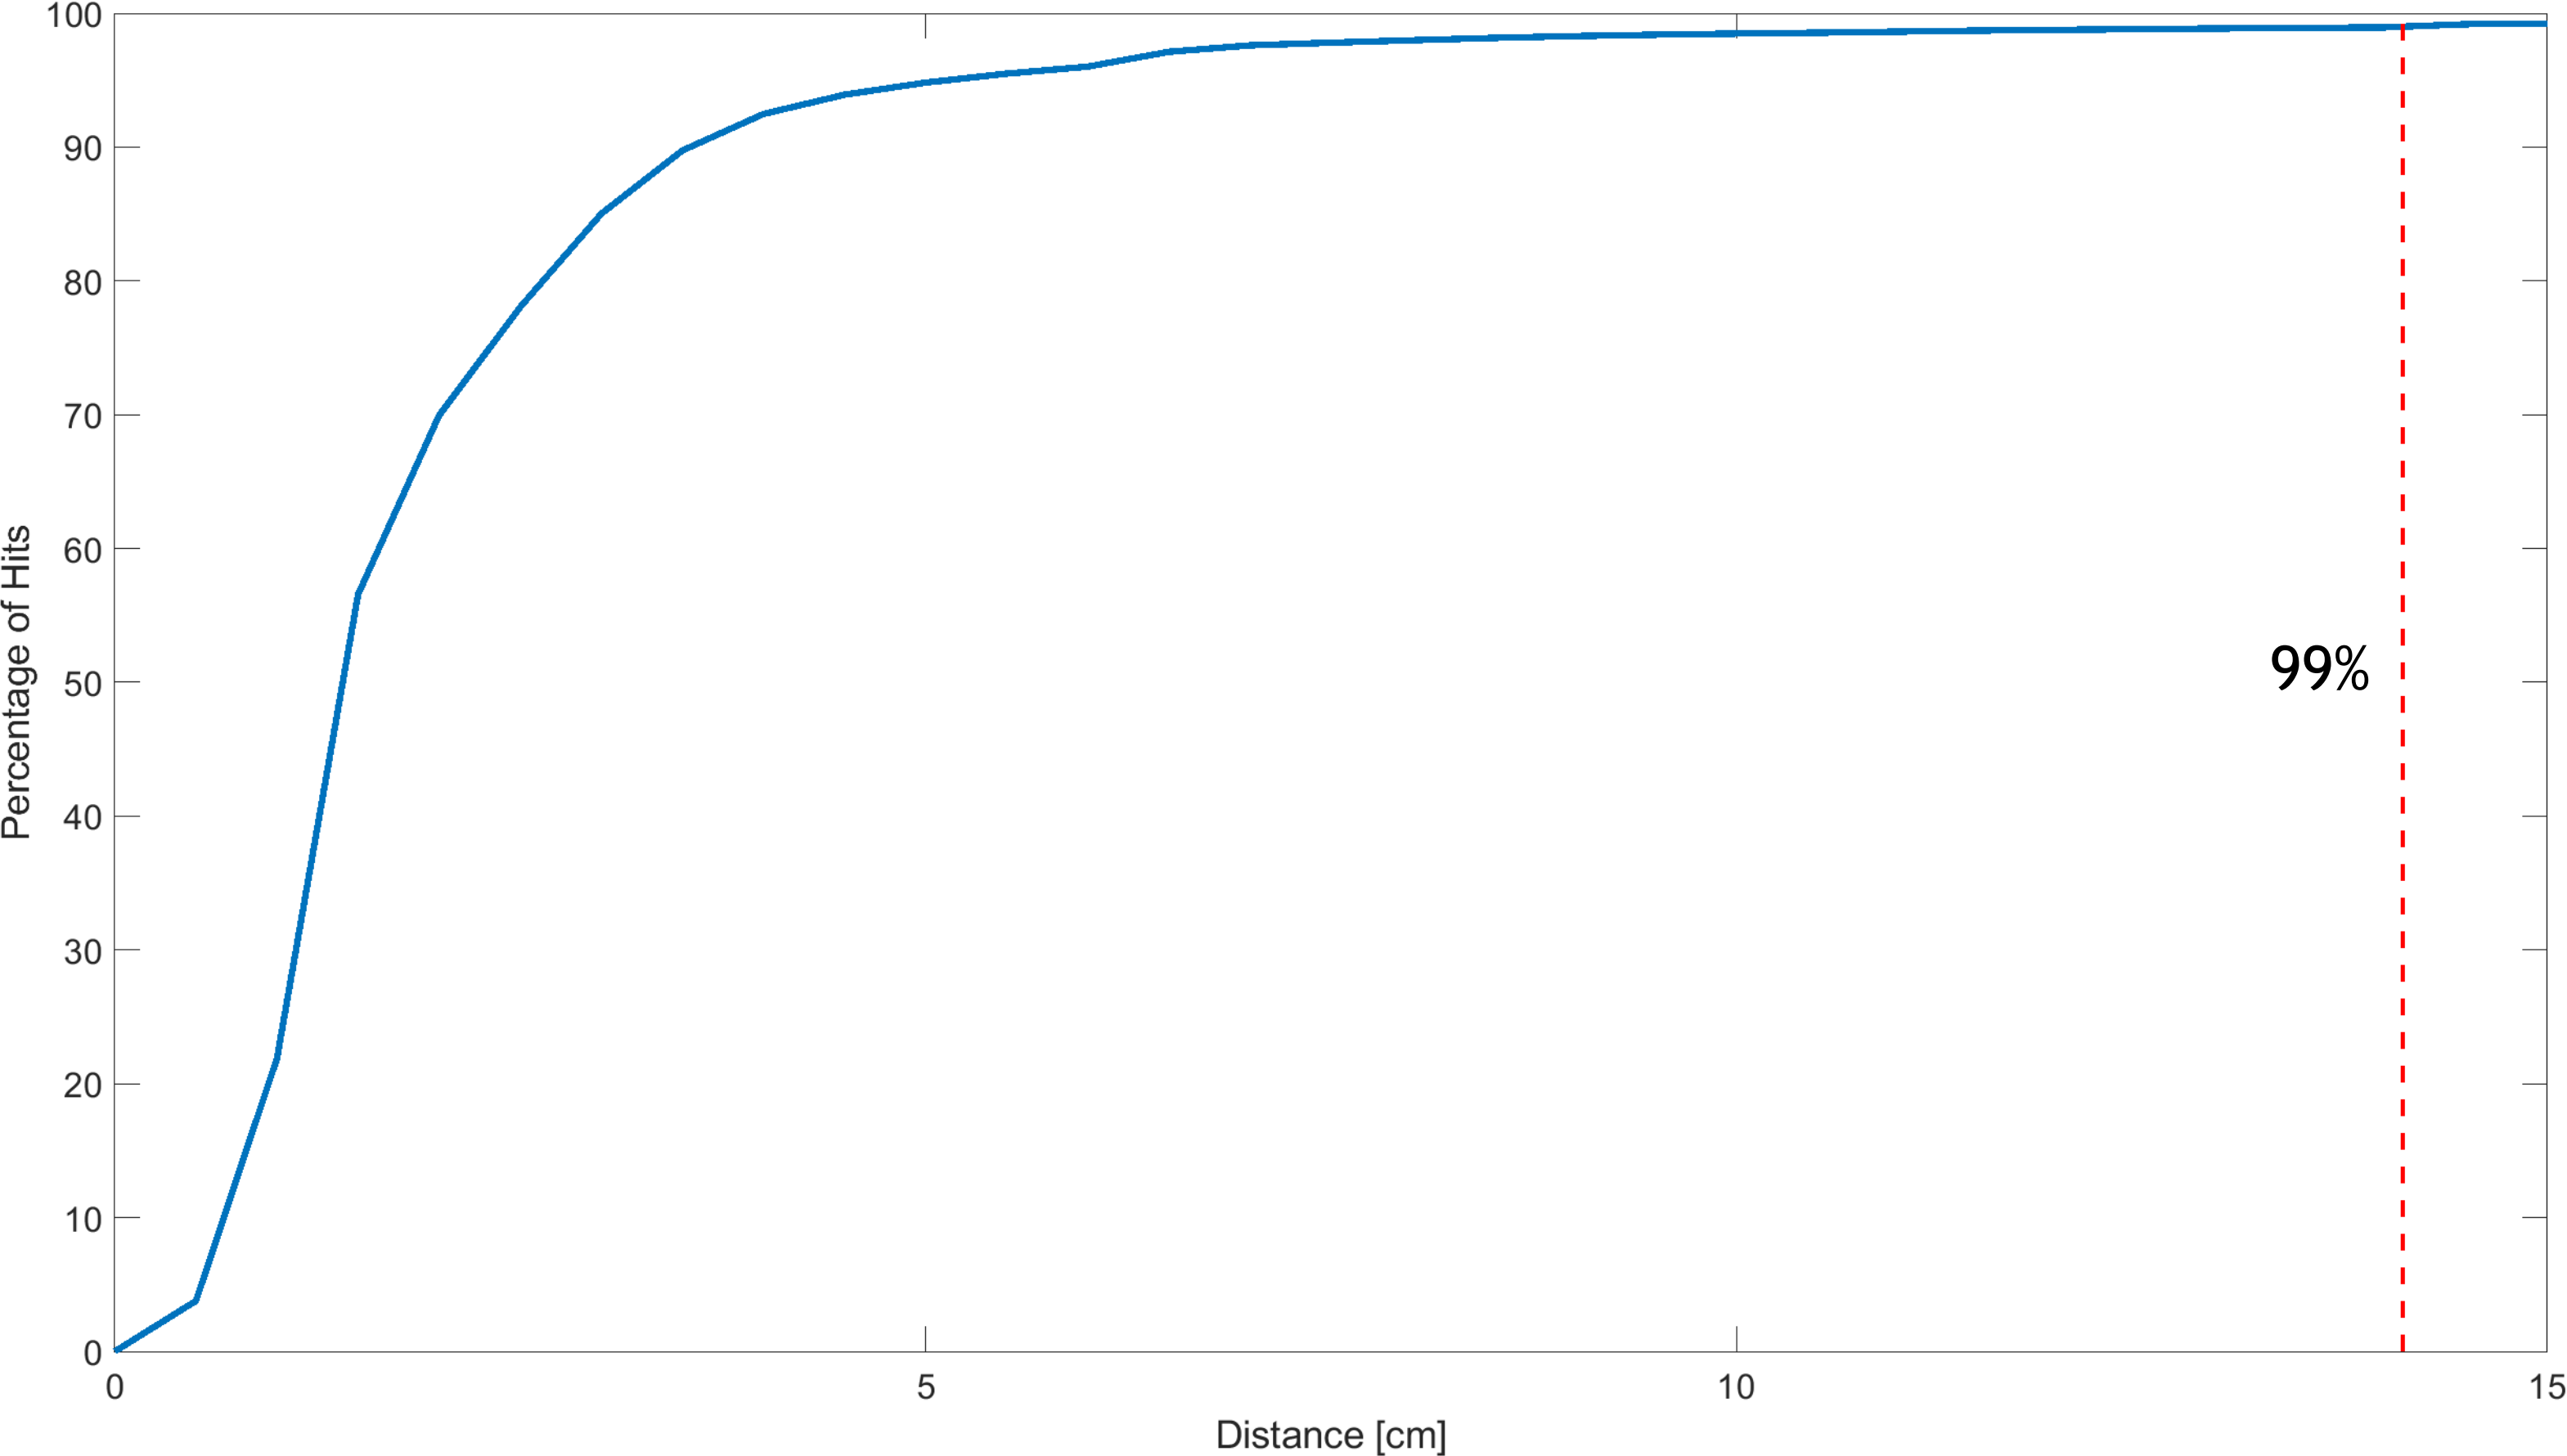

Supplement: supp [file elife-55195-supp-v2.zip]
